# Supplementary material for: Increased frequency of activated CD8+ T cell effectors in patients with psoriatic arthritis
Source: PubMed Central journal article supplement (PMC6659700; doi:10.1038/s41598-019-47310-5), 2019-07-26
Supplement: 41598_2019_47310_MOESM1_ESM.pdf [file 41598_2019_47310_MOESM1_ESM.pdf]

# **Increased frequency of activated CD8<sup>+</sup> T cell effectors in patients with psoriatic arthritis.**

Marco Diani<sup>1</sup>, Fabio Casciano<sup>2</sup>, Laura Marongiu<sup>3</sup>, Matteo Longhi<sup>4</sup>, Andrea Altomare<sup>1</sup>, Paolo D. Pigatto<sup>1</sup>, Paola Secchiero<sup>2</sup>, Roberto Gambari<sup>5</sup>, Giuseppe Banfi<sup>1,4,7</sup>, Angelo A. Manfredi<sup>6</sup>, Gianfranco Altomare<sup>1</sup>, Francesca Granucci<sup>3</sup> and Eva Reali<sup>5,7\*</sup>

<sup>1</sup> Department of Dermatology and Venereology, I.R.C.C.S Istituto Ortopedico Galeazzi, University of Milan, Milan, Italy.

<sup>2</sup> Department of Morphology, Surgery and Experimental Medicine and LTTA Centre, University of Ferrara, Ferrara, Italy.

<sup>3</sup> Department of Biotechnology and Biosciences, University of Milano-Bicocca, Milan, Italy.

<sup>4</sup> Department of Rheumatology, I.R.C.C.S. Istituto Ortopedico Galeazzi, Milan, Italy.

<sup>5</sup> Department of Life Sciences and Biotechnology, University of Ferrara, Ferrara, Italy.

<sup>6</sup> I.R.C.C.S. Ospedale San Raffaele & Università Vita-Salute San Raffaele, Milan, Italy.

<sup>7</sup> Laboratory of Translational Immunology, I.R.C.C.S Istituto Ortopedico Galeazzi, Milan, Italy.

Marco Diani, Fabio Casciano and Laura Marongiu contributed equally to this work.

\* Corresponding author

Correspondence and requests for materials should be addressed to E.R. (email: [eva.reali@grupposandonato.it](mailto:eva.reali@grupposandonato.it)).

## **Supplementary Information**

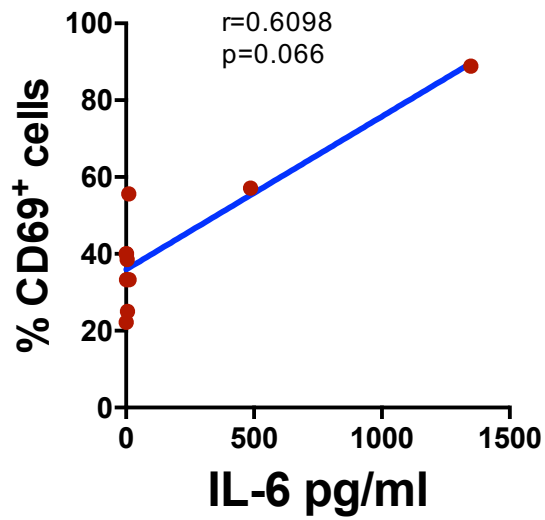

**Supplementary Figure 1**

**Correlation between CD69<sup>+</sup> cells in CCR6<sup>+</sup>CXCR3<sup>-</sup>CD8<sup>+</sup>T<sub>EMRA</sub> cells and IL-6 in patients with psoriatic arthritis.**

Spearman correlation analysis between the percentages of CD69<sup>+</sup> cells in CCR6<sup>+</sup>CXCR3<sup>-</sup>CD8<sup>+</sup>T<sub>EMRA</sub> cells and the serum level of IL-6 is reported in the figure.

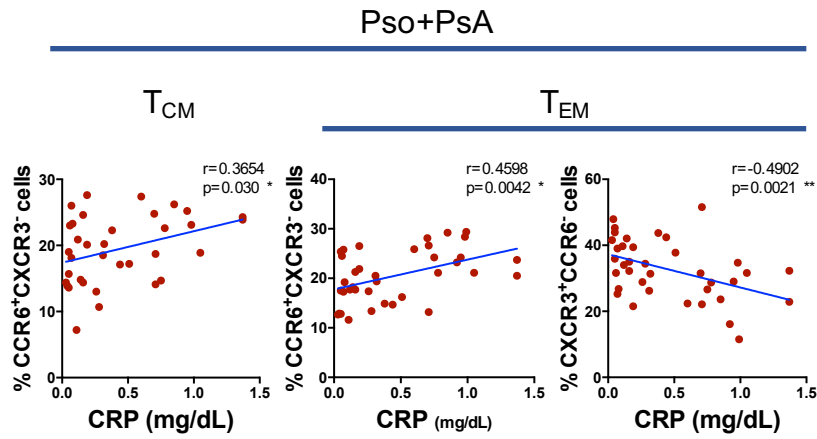

**Supplementary Figure 2 Correlation between CXCR3<sup>-</sup>CCR6<sup>+</sup> or CXCR3<sup>+</sup>CCR6<sup>-</sup> CD4<sup>+</sup> circulating T cells and CRP in patients with psoriatic disease.**

Correlation between the percentages of CCR6<sup>+</sup> CXCR3<sup>-</sup> and CXCR3<sup>+</sup>CCR6<sup>-</sup> CD4<sup>+</sup> T<sub>EM</sub> or T<sub>CM</sub> cells and the serum level of C-reactive protein in patients with psoriatic disease (PsO and PsA) is reported in the figure. p values <0.05 were considered significant: \* p<0.05.

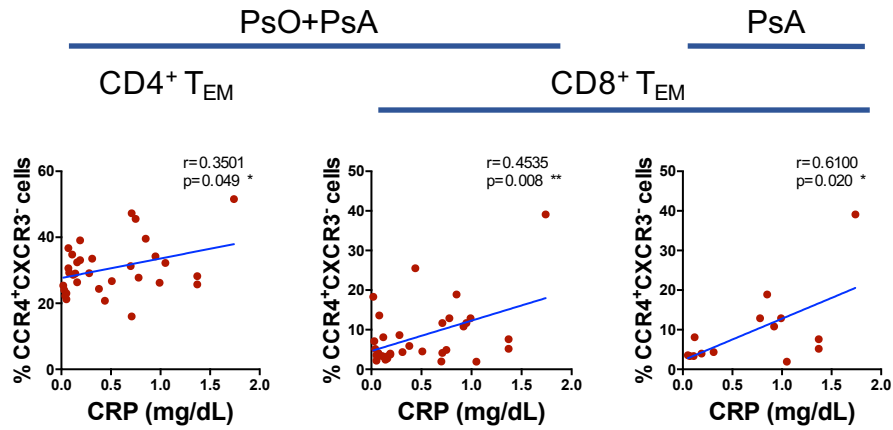

**Supplementary Figure 3. Correlation between circulating CCR4<sup>+</sup> CXCR3<sup>-</sup> CD4<sup>+</sup> and CD8<sup>+</sup> T<sub>EM</sub> cells and CRP in patients with PsA.**

Correlations between the percentages of CCR4<sup>+</sup> CXCR3<sup>-</sup> CD4<sup>+</sup> or CD8<sup>+</sup> T<sub>EM</sub> and the serum level of C-reactive protein in patients with either psoriatic disease (PsO and PsA) or with PsA only are reported in the figure. p values <0.05 were considered significant: \* p<0.05.

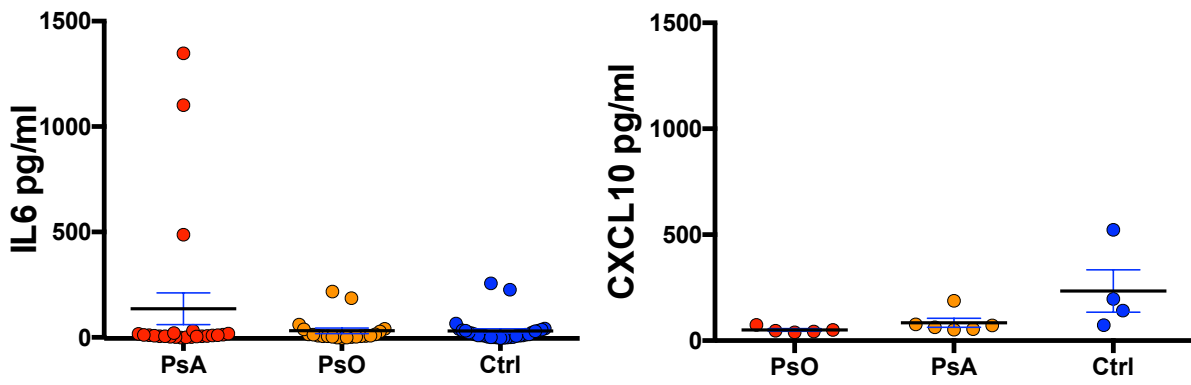

**Supplementary Figure 4. Serum level of IL-6 and CXCL10**

Serum concentration of CXCL10 and IL6 expressed as pg/ml in PsO and PsA patients and healthy subjects group. Horizontal bar represent mean value  $\pm$  SEM.

**Supplementary materials 1. Panels with antibody and fluorochromes used for the flow cytometric analysis.**

**Panel 1**

CCR4 PE-Cy7  
CCR7 PE  
CXCR3 PE-Cy5  
CD8 APC7  
CD4 v500  
CD45RA APC  
CLA FITC

**Panel 2**

CCR4 PE-Cy7  
CCR7 PE  
CXCR3 PE-Cy5  
CD8 APC-Cy7  
CD4 v500  
CD45RA FITC  
CD69 AF700

**Panel 3**

CD4 v500  
CD8 APC-Cy7  
CD45RA FITC  
CCR7 PE  
CCR6 PE-Cy7  
CCR4 AF647  
CCR5 PE-CF594  
CD103 BV421

**Panel 4**

CCR6 PE-Cy7  
CCR7 PE  
CXCR3 PE-Cy5  
CD8 APC-Cy7  
CD4 v500  
CD45RA APC  
CLA FITC

**Panel 5**

CCR6 PE-Cy7  
CCR7 PE  
CXCR3 PE-Cy5  
CD8 APC-Cy7  
CD4 v500  
CD45RA FITC  
CD69 AF700

**Panel 6**

CCR7 PE-Cy7

CD45RA FITC

CD4 APC-Cy7

CD8 APC

IFN- $\gamma$  V450

IL-17A PE

**Supplementary Table 1. Characteristics of Patients and Controls**

| Patient ID | Sex | Age | Disease   | Psa duration | PA SI | CRP (mg/dL) | Family history | Comorbidities  |
|------------|-----|-----|-----------|--------------|-------|-------------|----------------|----------------|
| PS002      | ♂   | 40  | Pso       | NA           | 10,5  | 0,98        | Mo             | AA             |
| PS003      | ♂   | 37  | Pso       | NA           | 6,5   | 0,05        | No             | None           |
| PS004      | ♂   | 24  | Pso       | NA           | 7     | 0,14        | Fa             | None           |
| PS005      | ♀   | 58  | Pso       | NA           | 7,5   | 0,05        | No             | HC, FP         |
| PS007      | ♂   | 56  | Pso       | NA           | 12,5  | 0,71        | No             | HC, AH, DC     |
| PS008      | ♀   | 55  | Pso       | NA           | 8,8   | 0,02        | Mo, Gf         | None           |
| PS011      | ♀   | 43  | Pso       | NA           | 8,2   | 0,51        | No             | None           |
| PS012      | ♀   | 61  | Pso       | NA           | 5,1   | 0,38        | Mo             | None           |
| PS013      | ♂   | 46  | Pso       | NA           | 7,5   | 0,08        | No             | None           |
| PS015      | ♀   | 50  | Pso       | NA           | 8,5   | 0,04        | No             | None           |
| PS016      | ♀   | 63  | Pso       | NA           | 12,9  | 0,07        | Mo, Au         | RA             |
| PS020      | ♂   | 30  | Pso       | NA           | 9,5   | 0,7         | No             | None           |
| PS023      | ♂   | 50  | Pso       | NA           | 12    | 0,71        | No             | HC             |
| PS024      | ♀   | 25  | Pso       | NA           | 9     | 0,03        | No             | None           |
| PS026      | ♀   | 41  | Pso       | NA           | 11,4  | 0,17        | Fa             | HT             |
| PS031      | ♂   | 52  | Pso       | NA           | 13,5  | 0,16        | Mo             | CH             |
| PS034      | ♂   | 20  | Pso       | NA           | 19,6  | 0,19        | Mo             | None           |
| PS044      | ♂   | 60  | Pso       | NA           | 19,7  | 0,95        | No             | None           |
| PS046      | ♂   | 52  | Pso       | NA           | 18    | 0,75        | No             | D              |
| PS053      | ♂   | 61  | Pso       | NA           | 10,5  | 0,44        | Gm             | HC, D          |
| PS054      | ♂   | 53  | Pso       | NA           | 20,2  | 0,16        | No             | HC             |
| PS063      | ♂   | 37  | Pso       | NA           | 19,2  | 0,28        | Co             | None           |
| PS076      | ♂   | 25  | Pso       | NA           | 18,4  | 0,6         | Mo             | None           |
| PS079      | ♂   | 39  | Pso       | NA           | 14    | 0,32        | Si, Gm         | None           |
| PS080      | ♂   | 45  | Pso       | NA           | 8     | 0,06        | No             | IHD, AH, HC    |
| PS081      | ♂   | 59  | Pso       | NA           | 15    | 0,26        | No             | None           |
| PSA010     | ♂   | 47  | Pso + PsA | 36           | 1     | 1,37        | No             | None           |
| PSA022     | ♂   | 45  | Pso + PsA | 36           | 3,5   | 0,34        | No             | HC             |
| PSA032     | ♀   | 45  | Pso + PsA | 80           | 10,1  | 0,85        | No             | HC             |
| PSA035     | ♀   | 63  | Pso + PsA | 84           | 14,5  | 0,78        | No             | HU             |
| PSA039     | ♂   | 48  | Pso + PsA | 6            | 0,8   | 1,74        | Br             | None           |
| PSA047     | ♂   | 42  | Pso + PsA | 2            | 12,8  | 0,05        | Mo             | None           |
| PSA050     | ♂   | 51  | Pso + PsA | 84           | 0,8   | 0,19        | No             | HC             |
| PSA094     | ♂   | 65  | Pso + PsA | 120          | 0     | 0,07        | No             | HC             |
| PSA059     | ♂   | 54  | Pso + PsA | 180          | 10    | 0,12        | Mo             | AH, DD, HS     |
| PSA060     | ♂   | 38  | Pso + PsA | 12           | 6,8   | 1,05        | Fa             | PP, CH         |
| PSA061     | ♂   | 48  | Pso + PsA | 48           | 19,3  | 0,11        | No             | None           |
| PSA085     | ♂   | 54  | Pso + PsA | 144          | 9,2   | 0,31        | No             | None           |
| PSA088     | ♂   | 49  | Pso + PsA | 2            | 1,5   | 0,99        | Mo, Da, Ni     | AH             |
| PSA090     | ♀   | 60  | Pso + PsA | 3            | 4     | 0,92        | Fa             | AH, HT, RU, FM |
| PSA091     | ♂   | 56  | Pso + PsA | 120          | 3     | 1,37        | No             | DS, HC         |



|             |   |    |      |    |   |    |    |      |
|-------------|---|----|------|----|---|----|----|------|
| C017        | ♀ | 43 | None | NA | 0 | ND | No | None |
| C018        | ♂ | 42 | None | NA | 0 | ND | No | None |
| C019        | ♀ | 38 | None | NA | 0 | ND | No | None |
| C021        | ♀ | 29 | None | NA | 0 | ND | No | None |
| C025        | ♂ | 56 | None | NA | 0 | ND | No | None |
| C028        | ♀ | 51 | None | NA | 0 | ND | No | None |
| C033        | ♀ | 40 | None | NA | 0 | ND | No | None |
| C036        | ♀ | 45 | None | NA | 0 | ND | No | None |
| C040        | ♂ | 55 | None | NA | 0 | ND | No | None |
| C041        | ♂ | 22 | None | NA | 0 | ND | No | None |
| C042        | ♂ | 45 | None | NA | 0 | ND | No | None |
| C043        | ♂ | 41 | None | NA | 0 | ND | No | None |
| C045        | ♀ | 55 | None | NA | 0 | ND | No | None |
| C048        | ♀ | 34 | None | NA | 0 | ND | No | None |
| C049        | ♀ | 34 | None | NA | 0 | ND | No | None |
| C057        | ♀ | 37 | None | NA | 0 | ND | No | None |
| C058        | ♀ | 56 | None | NA | 0 | ND | No | None |
| CCC         | ♀ | 24 | None | NA | 0 | ND | No | None |
| CLB         | ♀ | 23 | None | NA | 0 | ND | No | None |
| CMD         | ♂ | 29 | None | NA | 0 | ND | No | None |
| C072/ MCCO  | ♂ | 57 | None | NA | 0 | ND | No | None |
| C073/ COSS  | ♀ | 37 | None | NA | 0 | ND | No | None |
| C074/ Tart3 | ♂ | 55 | None | NA | 0 | ND | No | None |
| C077/ LACO  | ♂ | 49 | None | NA | 0 | ND | No | None |
| CAA         | ♂ | 38 | None | NA | 0 | ND | No | None |
| C092        | ♀ | 58 | None | NA | 0 | ND | No | None |

PsA duration is expressed in months. AH, arterial hypertension; CH, cholelithiasis; D, diabetes; DC, dilated cardiomyopathy; DD, depressive disorder; FM, fibromyalgia; FP, familial poliposis; HC, hypercholesterolemia; HS, hepatic steatosis; HT, hypothyroidism; HU, hyperuricemia; IHD, ischemic heart disease; PP, previous pericarditis; RA, rhizarthrosis; RU, recurrent uveitis; Au, aunts; Br, brother; Co, cousin; Da, dauther; Fa, father; Gf, grandfather; Gm, grandmother; Mo, mother; Ni, niece; Si, sister.
